# Supplementary material for: Enhancing grapevine breeding efficiency through genomic prediction and selection index
Source: PubMed Central journal article supplement (PMC10989862; doi:10.1093/g3journal/jkae038), 2024-02-24
Supplement: jkae038_supplementary_data.pdf [file jkae038_supplementary_data.pdf]

# Enhancing grapevine breeding efficiency through genomic prediction and selection index

## Supplemental Material

Charlotte Brault<sup>1,2,\*</sup>, Vincent Segura<sup>1,5</sup>, Maryline Roques<sup>1,2</sup>, Pauline Lamblin<sup>1,2</sup>, Virginie Bouckenooghe<sup>1,2</sup>, Nathalie Pouzalgues<sup>3</sup>, Constance Cuntly<sup>2,3</sup>, Matthieu Breil<sup>1,2</sup>, Marina Frouin<sup>4</sup>, Léa Garcin<sup>2,4</sup>, Louise Camps<sup>4</sup>, Marie-Agnès Ducasse<sup>2</sup>, Charles Romieu<sup>1,5</sup>, Gilles Masson<sup>2,3</sup>, Sébastien Julliard<sup>4</sup>, Timothée Flutre<sup>6</sup>, and Loïc Le Cunff<sup>1,2,\*</sup>

<sup>1</sup>UMT Geno-Vigne®<sup>®</sup>, IFV, INRAE, Institut Agro Montpellier, Montpellier  
34398, France

<sup>2</sup> Institut Français de la vigne et du vin, Pôle National Matériel Végétal, Le  
Grau du Roi 30240, France

<sup>3</sup>Centre du Rosé, Vidauban 83550, France

<sup>4</sup>Conservatoire du Vignoble Charentais, Institut de Formation de Richemont,  
Cherves-Richemont 16370, France

<sup>5</sup>AGAP Institut, Univ Montpellier, CIRAD, INRAE, Institut Agro,  
Montpellier, France

<sup>6</sup>INRAE, CNRS, AgroParisTech, Université Paris-Saclay, GQE—Le Moulon,  
Gif-sur-Yvette 91190, France

\*Corresponding authors: [charlotte.brault@live.com](mailto:charlotte.brault@live.com),  
[loic.lecunff@vignevin.com](mailto:loic.lecunff@vignevin.com)

## List of Figures

|           |                                                                                           |    |
|-----------|-------------------------------------------------------------------------------------------|----|
| Figure S1 | Number of offspring for each cross depending on the category . . . . .                    | 3  |
| Figure S2 | Phenotypic structure, results of PCA analysis. . . . .                                    | 11 |
| Figure S3 | Effect of the presence of cross effect in the mixed model on predictive ability . . . . . | 12 |
| Figure S4 | Distribution of genotypic values in the validation population . . . . .                   | 15 |
| Figure S5 | Strength and weakness of selected genotypes. . . . .                                      | 16 |
| Figure S6 | Observed and predicted values in across-population prediction . . . . .                   | 18 |
| Figure S7 | Across-population genetic relatedness . . . . .                                           | 19 |

## List of Tables

|          |                                                                                                          |    |
|----------|----------------------------------------------------------------------------------------------------------|----|
| Table S1 | Description of traits, variable name, definition, correspondence with the <i>Vitis</i> ontology. . . . . | 4  |
| Table S2 | Summary of variables for raw phenotypic data. . . . .                                                    | 6  |
| Table S3 | Summary of fitting information. . . . .                                                                  | 8  |
| Table S4 | Number of common SNP markers between populations . . . . .                                               | 10 |
| Table S5 | Ideotype definition . . . . .                                                                            | 13 |
| Table S6 | Summary of MGIDI output. . . . .                                                                         | 14 |
| Table S7 | Table of the 15 best individuals for both populations . . . . .                                          | 16 |

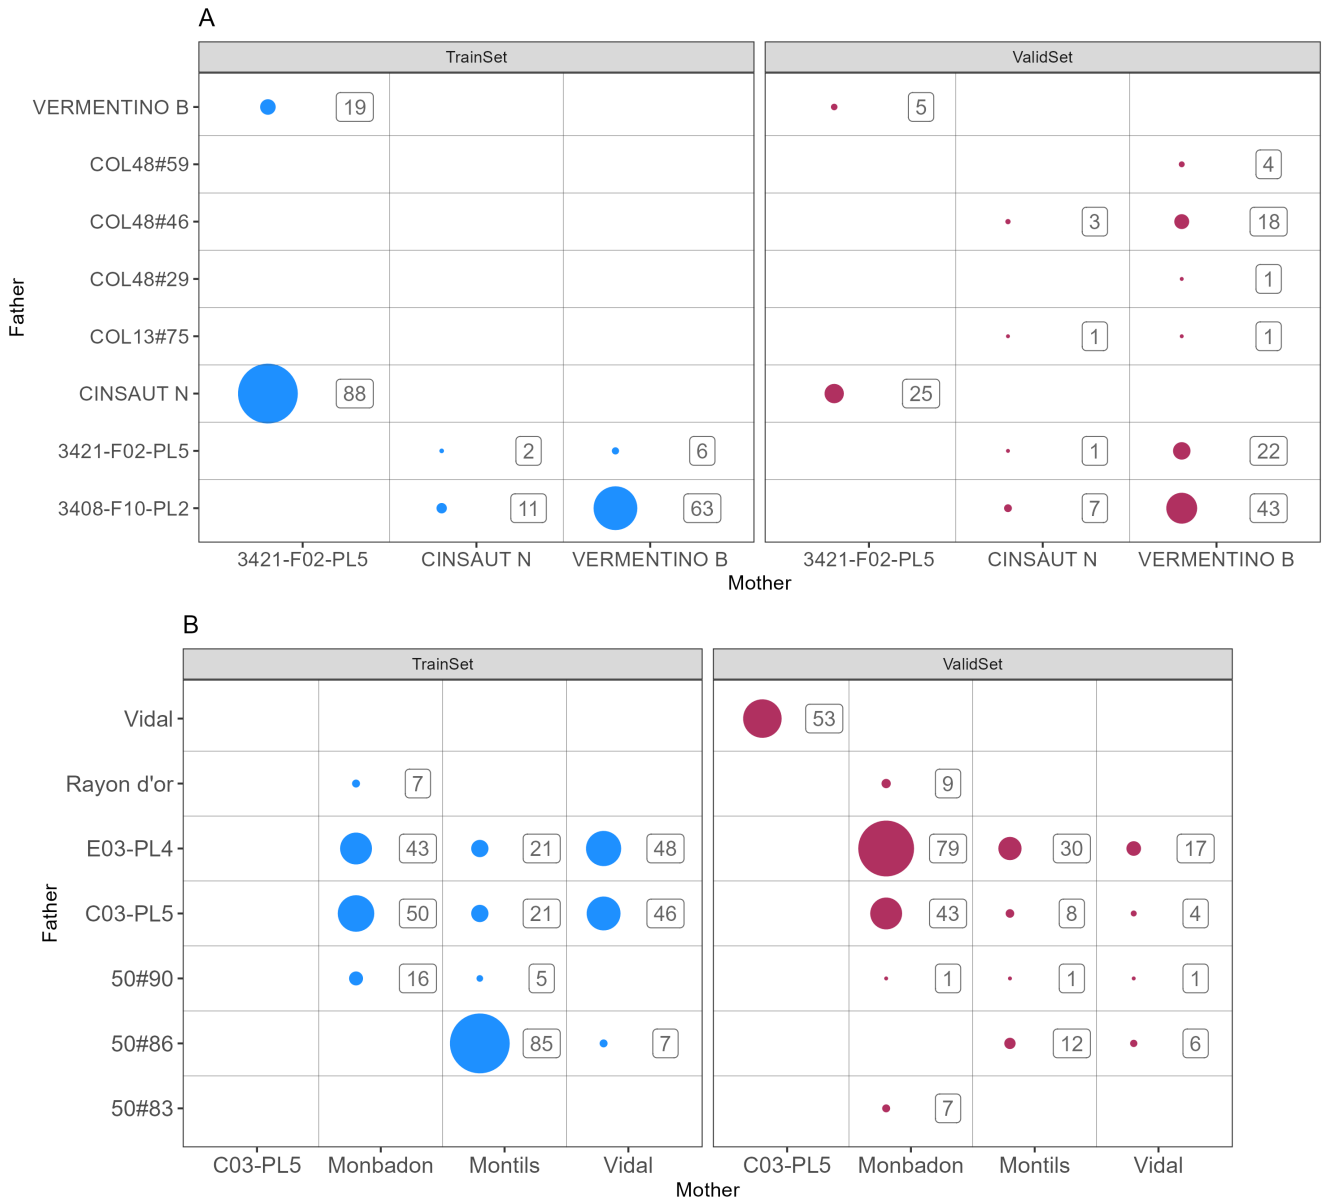

Figure S1: Number of offspring for each cross depending on the category (training set and validation set). A: EDGARR, B: Martell.

Table S1: Description of traits, variable name, definition, correspondence with the *Vitis* ontology.

| EDGARR                  |                                                                                                      |                       |          |
|-------------------------|------------------------------------------------------------------------------------------------------|-----------------------|----------|
| Variable                | description                                                                                          | VitisOntology_corresp | category |
| BERRY_ANTHO_meqMV       | Berry Anthocyanins content (in meq of malvidin)                                                      | NA                    | Antho    |
| BERRY_pH                | Measure of pH on berries                                                                             | CO_356:1000184        | Acid     |
| BER_ALC_C               | Potential alcohol content in berries                                                                 | NA                    | Sugar    |
| BER_ASCOR_ACID_HPLC_mgl | Concentration of ascorbic acid in berries, measured by HPLC in mg/L                                  | NA                    | Acid     |
| BER_CAFTA_ACID_HPLC_mg  | Concentration of caftaric acid in berries, measured by HPLC in mg/L                                  | NA                    | Acid     |
| BER_CCOUT_ACID_HPLC_mg  | Concentration of cis-coutaric acid in berries, measured by HPLC in mg/L                              | NA                    | Acid     |
| BER_COLOR_INT           | Color intensity measured on berries, determined by the sum of the absorbances at 420, 520 and 620 nm | NA                    | Color    |
| BER_FRUC_HPLC_g         | Fructose concentration in the berries (HPLC, g/l)                                                    | NA                    | Sugar    |
| BER_FRUC_HPLC_mgber     | Fructose amount per berry (HPLC, mg/berry)                                                           | NA                    | Sugar    |
| BER_GLUC_HPLC_g         | Glucose concentration in the berries (HPLC, g/l)                                                     | NA                    | Sugar    |
| BER_GLUC_HPLC_mgber     | Glucose amount per berry (HPLC, mg/berry)                                                            | NA                    | Sugar    |
| BER_GSH_HPLC_mg         | Glutathione concentration in the berries (HPLC, mg/l)                                                | NA                    | Acid     |
| BER_HYDROCIN_mgl        | Concentration of hydroxycinnamic acid in berries, measured by the absorbance at 320 nm, in mg/l.     | NA                    | Acid     |
| BER_LIGHT               | Perceptual lightness of berries, 0 to 100 for darkness to white (L* parameter).                      | NA                    | Color    |
| BER_MAL_HPLC            | Malic acid concentration in the berries (HPLC, g/l)                                                  | CO_356:1000299        | Acid     |
| BER_MAL_HPLC_mgber      | Malic acid amount per berry (HPLC, mg/berry)                                                         | NA                    | Acid     |
| BER_PI420               | Polymeric pigments measured on berries by the absorbance at 420 nm                                   | NA                    | Color    |
| BER_PI520               | Polymeric pigments measured on berries by the absorbance at 520 nm                                   | NA                    | Color    |
| BER_RED                 | Redness measured on berries on a green to red scale (a* parameter).                                  | NA                    | Color    |
| BER_SHIK_HPLC_g         | Shikimic acid concentration in the berries (HPLC, g/l)                                               | NA                    | Acid     |
| BER_SHIK_HPLC_mgber     | Shikimic acid amount per berry (HPLC, mg/berry)                                                      | NA                    | Acid     |
| BER_TART_HPLC_g         | Tartaric acid concentration in the berries (HPLC, g/l)                                               | CO_356:1000301        | Acid     |
| BER_TART_HPLC_mgber     | Tartaric acid amount per berry (HPLC, mg/berry)                                                      | NA                    | Acid     |
| BER_TA_g                | Titrateable acidity of the berries (g/l H2SO4)                                                       | CO_356:1000302        | Acid     |
| BER_TCOUT_ACID_mgl      | Concentration of trans-coutaric acid on berries, measured by HPLC in mg/L                            | NA                    | Acid     |
| BER_TINT                | Tint or hue measured on berries, corresponding of the ration between the 420 and 520 nm absorbances. | NA                    | Color    |
| BER_TOTAL_ANTHO         | Total anthocyanins measured on berries, by the absorbance at 520 nm                                  | NA                    | Antho    |
| BER_TPI                 | Total polyphenol index measured in berries, determined by the absorbance at 280 nm.                  | NA                    | Antho    |
| BER_YELLOW              | Yellowness measured on berries on a blue to yellow scale (b* parameter).                             | NA                    | Color    |
| HARVEST_DOY             | Harvest date (Day of year)                                                                           | CO_356:1000289        | Pheno    |
| NB_CLUST_PLANT          | Number of clusters per plant                                                                         | CO_356:1000158        | Agro     |
| OD_420                  | Optical density at 420 nm (yellow color)                                                             | NA                    | Color    |
| OD_520                  | Optical density at 520 nm (red color)                                                                | NA                    | Color    |
| OD_620                  | Optical density at 620 nm (blue color)                                                               | NA                    | Color    |
| SBER_W_g                | Single berry weight                                                                                  | CO_356:2000144        | Agro     |

| Martell           |                                                                                 |                                                                                                         |          |
|-------------------|---------------------------------------------------------------------------------|---------------------------------------------------------------------------------------------------------|----------|
| Variable          | Description                                                                     | VitisOntology_corresp                                                                                   | category |
| BUD_RELATIVE_CHAS | Bud burst date, relative to the mean bud burst date of Chasselas from plot      | NA                                                                                                      | Pheno    |
| FERT_GLOB         | Number of inflorescences per shoot (all kinds of shoots)                        | <a href="https://cropontology.org/term/CO_356:1000266">https://cropontology.org/term/CO_356:1000266</a> | Agro     |
| FERT_PRIM         | Total number of inflorescences/number of primary shoots                         | <a href="https://cropontology.org/term/CO_356:1000267">https://cropontology.org/term/CO_356:1000267</a> | Agro     |
| FERT_SPURS        | Number of inflorescences per shoot on spurs                                     | <a href="https://cropontology.org/term/CO_356:1000265">https://cropontology.org/term/CO_356:1000265</a> | Agro     |
| FLO_RELATIVE_CHAS | Flowering date, relative to the mean flowering date of Chasselas from plot      | NA                                                                                                      | Pheno    |
| INT_L             | Internode length                                                                | <a href="https://cropontology.org/term/CO_356:1000093">https://cropontology.org/term/CO_356:1000093</a> | Vigor    |
| INT_L_45          | Internode length of rank 4 and 5 in cm                                          | NA                                                                                                      | Vigor    |
| INT_NB            | Number of internodes                                                            | NA                                                                                                      | Vigor    |
| LEAF_ERINOSE_PC   | Percentage of erinose symptoms on leaves                                        | NA                                                                                                      | Disease  |
| MORPHO_OIV_006    | Shoot attitude                                                                  | <a href="https://cropontology.org/term/CO_356:1000198">https://cropontology.org/term/CO_356:1000198</a> | Techno   |
| MORPHO_OIV_152    | Insertion of 1st inflorescence                                                  | <a href="https://cropontology.org/term/CO_356:1000091">https://cropontology.org/term/CO_356:1000091</a> | Techno   |
| MORPHO_OIV_204    | Bunch density                                                                   | <a href="https://cropontology.org/term/CO_356:1000037">https://cropontology.org/term/CO_356:1000037</a> | Techno   |
| MORPHO_OIV_240    | Berry: ease of detachment from pedice                                           | <a href="https://cropontology.org/term/CO_356:1000018">https://cropontology.org/term/CO_356:1000018</a> | Techno   |
| MUST_ALC_C        | Probable alcohol content in must, in %                                          | NA                                                                                                      | Vini     |
| MUST_K            | Must Potassium concentration                                                    | <a href="https://cropontology.org/term/CO_356:1000188">https://cropontology.org/term/CO_356:1000188</a> | Vini     |
| MUST_MAL_gH2SO4l  | Concentration of malic acid in must (equivalence g/l of H2SO4)                  | NA                                                                                                      | Vini     |
| MUST_N_AA&NH4     | Nitrohen content of the must (sum of N-NH4 and N-amino ac.) in g/l              | <a href="https://cropontology.org/term/CO_356:1000355">https://cropontology.org/term/CO_356:1000355</a> | Vini     |
| MUST_TAR_H2SO4    | Concentration of tartaric acid in must, expressed in equivalence of H2SO4 in gl | NA                                                                                                      | Vini     |
| MUST_TA_H2SO4     | Must titratable acidity (equivalence g/l of H2SO4)                              | <a href="https://cropontology.org/term/CO_356:1000293">https://cropontology.org/term/CO_356:1000293</a> | Vini     |
| MUST_Y_PLANT      | Must yield per plant, in mL                                                     | NA                                                                                                      | Vini     |
| MUST_pH           | Must pH                                                                         | <a href="https://cropontology.org/term/CO_356:1000185">https://cropontology.org/term/CO_356:1000185</a> | Vini     |
| NB_CLUST_PLANT    | Number of clusters per plant                                                    | <a href="https://cropontology.org/term/CO_356:1000158">https://cropontology.org/term/CO_356:1000158</a> | Agro     |
| SBER_W_g          | Single berry weight in gram                                                     | <a href="https://cropontology.org/term/CO_356:1000215">https://cropontology.org/term/CO_356:1000215</a> | Agro     |
| SCLUST_W_G        | Cluster weight                                                                  | <a href="https://cropontology.org/term/CO_356:1000048">https://cropontology.org/term/CO_356:1000048</a> | Agro     |
| SHOOT_II_FREQ_0   | Frequence of shoots with no internodes                                          | NA                                                                                                      | Vigor    |
| SHOOT_L           | Primary shoot length                                                            | <a href="https://cropontology.org/term/CO_356:1000211">https://cropontology.org/term/CO_356:1000211</a> | Vigor    |
| VER_RELATIVE_CHAS | Véraison date, relative to the mean véraison date of Chasselas from plot        | NA                                                                                                      | Pheno    |
| VIGOUR_VISUAL     | Visual vigour observation in a 1-9 scale (by 2)                                 | NA                                                                                                      | Vigor    |
| WOODM_OIV_305     | Time of beginning of wood maturity                                              | <a href="https://cropontology.org/term/CO_356:1000228">https://cropontology.org/term/CO_356:1000228</a> | Techno   |
| YIELD_PLANT       | Total weight harvest per plant                                                  | <a href="https://cropontology.org/term/CO_356:1000247">https://cropontology.org/term/CO_356:1000247</a> | Agro     |

Table S2: Summary of variables for raw phenotypic data.

| EDGARR                  |     |        |           |        |          |          |        |
|-------------------------|-----|--------|-----------|--------|----------|----------|--------|
| Variable                | N   | Mean   | Std. Dev. | Min    | Pctl. 25 | Pctl. 75 | Max    |
| HARVEST_DOY             | 403 | 263.29 | 24.20     | 173.00 | 248.00   | 280.00   | 301.00 |
| NB_CLUST_PLANT          | 343 | 10.81  | 7.59      | 0.00   | 5.00     | 15.00    | 41.00  |
| BER_GSH_HPLC_mg         | 93  | 16.26  | 19.09     | 0.83   | 3.22     | 22.29    | 95.80  |
| BER_GLUC_HPLC_mgber     | 179 | 340.54 | 79.65     | 174.90 | 286.76   | 376.54   | 708.15 |
| BER_GLUC_HPLC_g         | 179 | 88.47  | 10.31     | 45.27  | 82.16    | 94.27    | 129.36 |
| BER_FRUC_HPLC_mgber     | 179 | 337.95 | 78.77     | 169.33 | 282.66   | 372.51   | 659.49 |
| BER_FRUC_HPLC_g         | 179 | 87.83  | 10.83     | 43.83  | 81.44    | 94.94    | 126.54 |
| BER_TART_HPLC_mgber     | 179 | 30.98  | 8.39      | 17.27  | 24.51    | 35.90    | 56.92  |
| BER_TART_HPLC_g         | 179 | 8.03   | 1.62      | 4.74   | 6.72     | 9.24     | 13.02  |
| BER_MAL_HPLC_mgber      | 179 | 51.98  | 18.59     | 23.71  | 38.11    | 62.73    | 116.48 |
| BER_MAL_HPLC            | 179 | 13.34  | 3.23      | 7.08   | 10.86    | 15.36    | 23.30  |
| BER_SHIK_HPLC_mgber     | 178 | 0.10   | 0.10      | 0.00   | 0.03     | 0.13     | 0.75   |
| BER_SHIK_HPLC_g         | 178 | 0.03   | 0.03      | 0.00   | 0.01     | 0.03     | 0.17   |
| BER_ASCOR_ACID_HPLC_mgl | 101 | 5.67   | 2.95      | 1.11   | 3.56     | 7.27     | 14.80  |
| BER_CAFTA_ACID_HPLC_mg  | 101 | 142.56 | 59.85     | 38.88  | 102.19   | 176.63   | 312.28 |
| BER_TCOUT_ACID_mgl      | 101 | 175.40 | 99.72     | 19.05  | 104.74   | 225.04   | 572.03 |
| BER_CCOUT_ACID_HPLC_mg  | 101 | 33.94  | 18.54     | 7.24   | 18.93    | 42.58    | 100.95 |
| SBER_W_g                | 267 | 390.25 | 125.47    | 46.54  | 308.36   | 467.96   | 789.90 |
| BER_ALC_C               | 267 | 11.79  | 1.01      | 7.69   | 11.34    | 12.42    | 14.08  |
| BER_TA_g                | 265 | 5.52   | 1.48      | 2.90   | 4.50     | 6.45     | 10.40  |
| BERRY_pH                | 262 | 3.73   | 0.23      | 3.18   | 3.56     | 3.90     | 4.41   |
| BERRY_ANTHO_meqMV       | 233 | 70.74  | 80.00     | -8.77  | 15.34    | 111.48   | 503.23 |
| BER_LIGHT               | 272 | 63.21  | 17.61     | 0.06   | 50.09    | 77.08    | 95.42  |
| BER_RED                 | 272 | 28.31  | 18.48     | -2.04  | 13.95    | 42.52    | 66.00  |
| BER_YELLOW              | 272 | 17.72  | 9.44      | -6.95  | 10.22    | 24.43    | 47.73  |
| OD_420                  | 272 | 0.80   | 0.57      | 0.15   | 0.48     | 0.96     | 7.19   |
| OD_520                  | 272 | 0.94   | 0.81      | 0.07   | 0.43     | 1.19     | 6.85   |
| OD_620                  | 272 | 0.25   | 0.27      | 0.00   | 0.12     | 0.31     | 3.62   |
| BER_COLOR_INT           | 272 | 1.99   | 1.56      | 0.28   | 1.04     | 2.50     | 17.66  |
| BER_TINT                | 272 | 1.11   | 0.55      | 0.35   | 0.68     | 1.43     | 3.56   |
| BER_PI420               | 239 | 0.54   | 0.37      | 0.02   | 0.32     | 0.66     | 3.85   |
| BER_PI520               | 239 | 0.28   | 0.24      | 0.01   | 0.15     | 0.33     | 2.98   |
| BER_TPI                 | 235 | 13.11  | 5.11      | 4.61   | 9.64     | 15.60    | 43.65  |
| BER_HYDROCIN_mgl        | 235 | 9.64   | 3.60      | 3.49   | 6.93     | 12.10    | 27.50  |
| BER_TOTAL_ANTHO         | 235 | 3.99   | 4.10      | -0.27  | 1.21     | 5.89     | 26.21  |

| Martell           |     |         |           |        |          |          |         |
|-------------------|-----|---------|-----------|--------|----------|----------|---------|
| Variable          | N   | Mean    | Std. Dev. | Min    | Pctl. 25 | Pctl. 75 | Max     |
| BUD_RELATIVE_CHAS | 739 | 9.20    | 7.11      | -2.00  | 3.00     | 14.00    | 50.00   |
| FLO_RELATIVE_CHAS | 668 | 0.97    | 4.08      | -23.00 | -1.00    | 5.00     | 16.00   |
| VER_RELATIVE_CHAS | 661 | 22.34   | 10.49     | -10.00 | 11.00    | 35.00    | 45.00   |
| WOODM_OIV_305     | 739 | 50.10   | 31.28     | 0.00   | 25.00    | 80.00    | 100.00  |
| LEAF_ERINOSE_PC   | 739 | 0.64    | 0.92      | 0.00   | 0.00     | 1.00     | 3.00    |
| MORPHO_OIV_006    | 738 | 3.27    | 1.60      | 1.00   | 2.00     | 5.00     | 9.00    |
| MORPHO_OIV_152    | 674 | 1.92    | 0.47      | 1.00   | 2.00     | 2.00     | 3.00    |
| FERT_GLOB         | 739 | 5.91    | 3.48      | 0.00   | 3.00     | 8.00     | 19.00   |
| FERT_PRIM         | 739 | 1.20    | 0.70      | 0.00   | 0.60     | 1.80     | 3.80    |
| FERT_SPURS        | 701 | 0.57    | 1.03      | 0.00   | 0.00     | 1.00     | 6.00    |
| SHOOT_L           | 739 | 67.01   | 24.80     | 0.00   | 48.50    | 82.20    | 174.20  |
| INT_NB            | 739 | 2.47    | 2.81      | 0.00   | 0.00     | 3.80     | 48.50   |
| SHOOT_II_FREQ_0   | 739 | 0.98    | 1.38      | 0.00   | 0.00     | 2.00     | 5.00    |
| INT_L_45          | 739 | 5.16    | 4.77      | 0.00   | 2.00     | 7.18     | 35.90   |
| INT_L             | 739 | 5.26    | 1.33      | 0.00   | 4.40     | 6.00     | 11.50   |
| MORPHO_OIV_204    | 673 | 2.25    | 0.75      | 1.00   | 2.00     | 3.00     | 3.00    |
| YIELD_PLANT       | 674 | 1.46    | 1.18      | 0.02   | 0.69     | 1.92     | 9.42    |
| NB_CLUST_PLANT    | 739 | 7.46    | 4.59      | 0.00   | 4.00     | 10.00    | 25.00   |
| SCLUST_W_G        | 674 | 175.72  | 97.45     | 1.80   | 110.08   | 220.07   | 735.00  |
| MORPHO_OIV_240    | 672 | 1.91    | 0.56      | 0.50   | 1.50     | 2.30     | 3.50    |
| SBER_W_g          | 674 | 3.04    | 1.23      | 0.41   | 2.06     | 3.87     | 7.47    |
| MUST_Y_PLANT      | 674 | 649.94  | 636.88    | 12.00  | 275.00   | 860.00   | 7070.00 |
| MUST_ALC_C        | 673 | 11.01   | 2.36      | 2.51   | 9.94     | 12.55    | 17.10   |
| MUST_TA_H2SO4     | 673 | 4.96    | 1.91      | 1.46   | 3.42     | 6.20     | 16.20   |
| MUST_pH           | 660 | 3.15    | 0.19      | 2.64   | 3.02     | 3.26     | 4.02    |
| MUST_TAR_H2SO4    | 661 | 6.19    | 1.67      | 0.71   | 5.10     | 7.40     | 11.00   |
| MUST_MAL_gH2SO4I  | 661 | 3.04    | 2.18      | 0.00   | 1.46     | 4.10     | 16.70   |
| MUST_K            | 661 | 1277.36 | 244.67    | 788.00 | 1081.00  | 1428.00  | 2156.00 |
| MUST_N_AA&NH4     | 657 | 177.48  | 65.86     | 27.00  | 133.00   | 216.00   | 557.00  |
| VIGOUR_VISUAL     | 738 | 7.42    | 2.16      | 1.00   | 7.00     | 9.00     | 9.00    |

Table S3: Summary of fitting information.

missing.dat: percentage of missing data; ngeno: number of genotypes; fixed.effects: list of fixed effects included; random.effects: list of random effects included; var.geno: genetic variance (genotype + cross effect); var.resid: residual variance, var.tot: total variance, H2: broad-sense heritability; h2: narrow-sense heritability

| EDGARR              |             |       |               |                |          |           |           |       |       |
|---------------------|-------------|-------|---------------|----------------|----------|-----------|-----------|-------|-------|
| trait               | missing.dat | ngeno | fixed.effects | random.effects | var.geno | var.resid | var.tot   | H2    | h2    |
| OD_620              | 41          | 169   | year          | geno, row, col | 0.00     | 0.02      | 0.03      | 0.176 | 0.044 |
| OD_420              | 41          | 169   | year          | geno           | 0.03     | 0.12      | 0.15      | 0.191 | 0.059 |
| OD_520              | 41          | 169   |               | geno, cross    | 0.14     | 0.29      | 0.55      | 0.481 | 0.217 |
| BER_HYDROCIN_mgl    | 49          | 152   | year          | geno, cross    | 2.95     | 5.99      | 12.66     | 0.527 | 0.265 |
| BERRY_ANTHO_meqMV   | 49          | 150   |               | geno, cross    | 1,181.89 | 3,698.13  | 6,592.34  | 0.439 | 0.256 |
| BER_TA_g            | 42          | 166   | year          | geno, row, col | 0.61     | 1.53      | 2.14      | 0.284 | 0.193 |
| BER_FRUC_HPLC_mgber | 61          | 127   | year          | geno, row, col | 0.04     | 3,692.72  | 4,362.25  | 0.000 | 0.076 |
| BER_GLUC_HPLC_g     | 61          | 127   | year          | geno, row, col | 0.21     | 68.08     | 111.78    | 0.003 | 0.073 |
| BER_GLUC_HPLC_mgber | 61          | 127   | year          | geno, row, col | 190.47   | 3,836.27  | 4,557.25  | 0.047 | 0.041 |
| BER_LIGHT           | 41          | 169   | year          | geno, cross    | 58.39    | 154.87    | 289.40    | 0.465 | 0.271 |
| BER_YELLOW          | 40          | 169   | year          | geno, row, col | 5.50     | 72.92     | 89.81     | 0.070 | 0.239 |
| BER_RED             | 40          | 169   |               | geno, cross    | 61.87    | 170.49    | 396.58    | 0.570 | 0.314 |
| BER_COLOR_INT       | 41          | 169   | year          | geno, cross    | 0.32     | 0.93      | 1.50      | 0.377 | 0.133 |
| BER_TPI             | 49          | 152   |               | geno, cross    | 5.38     | 14.23     | 22.78     | 0.375 | 0.263 |
| BER_MAL_HPLC        | 61          | 127   | year          | geno           | 4.18     | 2.72      | 6.91      | 0.606 | 0.638 |
| BER_MAL_HPLC_mgber  | 61          | 127   | year          | geno           | 74.12    | 105.14    | 179.26    | 0.414 | 0.325 |
| BER_TINT            | 40          | 169   |               | geno, cross    | 0.08     | 0.12      | 0.31      | 0.613 | 0.368 |
| BERRY_pH            | 43          | 166   | year          | geno, row, col | 0.01     | 0.04      | 0.05      | 0.249 | 0.211 |
| BER_PI420           | 48          | 151   | year          | geno, row, col | 0.02     | 0.07      | 0.09      | 0.191 | 0.054 |
| BER_PI520           | 48          | 151   | year          | geno, row, col | 0.01     | 0.02      | 0.03      | 0.197 | 0.091 |
| BER_TOTAL_ANTHO     | 48          | 152   |               | geno, cross    | 3.27     | 9.81      | 17.00     | 0.423 | 0.260 |
| BER_SHIK_HPLC_g     | 61          | 126   | year          | geno, cross    | 0.00     | 0.00      | 0.00      | 0.692 | 0.174 |
| BER_SHIK_HPLC_mgber | 61          | 126   | year          | geno           | 0.00     | 0.00      | 0.01      | 0.579 | 0.574 |
| BER_ALC_C           | 41          | 168   |               | geno, row, col | 0.13     | 0.85      | 1.01      | 0.136 | 0.100 |
| BER_TART_HPLC_g     | 61          | 127   | year          | geno, row, col | 0.51     | 1.54      | 2.64      | 0.248 | 0.493 |
| BER_TART_HPLC_mgber | 61          | 127   | year          | geno, row, col | 2.87     | 42.78     | 49.21     | 0.063 | 0.264 |
| HARVEST_DOY         | 12          | 203   | year          | geno, cross    | 110.02   | 400.03    | 557.32    | 0.282 | 0.264 |
| NB_CLUST_PLANT      | 25          | 196   |               | geno, row, col | 2.78     | 50.82     | 58.13     | 0.052 | 0.094 |
| SBER_W_g            | 41          | 168   |               | geno, cross    | 3,684.50 | 11,030.34 | 16,197.25 | 0.319 | 0.185 |



| Martell         |             |        |              |               |                              |            |           |            |            |       |       |
|-----------------|-------------|--------|--------------|---------------|------------------------------|------------|-----------|------------|------------|-------|-------|
| trait           | missing.dat | n geno | semi.quantif | fixed.effects | random.effects               | var.geno   | var.cross | var.resid  | var.tot    | H2    | h2    |
| DBT_RELATIVE    | 0           | 358    | FALSE        | year          | geno                         | 16.76      | NA        | 32.23      | 49.00      | 0.342 | 0.249 |
| ERINO_LEAF_PC   | 0           | 358    | FALSE        | year          | geno                         | 0.05       | NA        | 0.49       | 0.55       | 0.098 | 0.141 |
| FERT_COURSON    | 5           | 358    | FALSE        | year          | geno                         | 0.20       | NA        | 0.76       | 0.97       | 0.211 | 0.230 |
| FERT_GLOB       | 0           | 358    | FALSE        | year          | geno, Cross                  | 1.36       | 5.29      | 8.22       | 12.48      | 0.341 | 0.249 |
| FERT_PRIM       | 0           | 358    | FALSE        | year          | geno, Cross                  | 0.06       | 1,925.34  | 0.32       | 0.51       | 0.360 | 0.263 |
| FLO_RELATIVE    | 10          | 349    | FALSE        | year          | geno, col                    | 1.12       | NA        | 7.94       | 9.47       | 0.124 | 0.119 |
| INT_L           | 0           | 358    | FALSE        |               | geno, row, management        | 0.20       | NA        | 1.43       | 1.81       | 0.122 | 0.116 |
| MORPHO_OIV_006  | 0           | 358    | TRUE         | year          | geno, Cross                  | 0.26       | 0.03      | 1.59       | 1.90       | 0.164 | 0.139 |
| MORPHO_OIV_152  | 9           | 345    | TRUE         | year          | geno                         | 0.03       | NA        | 0.18       | 0.21       | 0.164 | 0.122 |
| MORPHO_OIV_204  | 9           | 348    | TRUE         |               | geno, Cross, row, col        | 0.67       | 8,304.02  | 0.02       | 0.94       | 0.976 | 0.986 |
| MORPHO_OIV_240  | 9           | 347    | FALSE        |               | geno, Cross                  | 0.08       | 2.90      | 0.19       | 0.32       | 0.406 | 0.392 |
| MUST_MALIQUE    | 11          | 347    | FALSE        | year          | geno, Cross, RPV3            | 0.93       | 0.05      | 1.12       | 2.84       | 0.581 | 0.051 |
| MUST_NASS       | 11          | 344    | FALSE        | year          | geno, Cross, row             | 1,189.98   | 0.21      | 2,212.11   | 4,000.39   | 0.371 | 0.417 |
| MUST_pH         | 11          | 346    | FALSE        | year          | geno, Cross, col             | 0.00       | 5.29      | 0.01       | 0.03       | 0.528 | 0.363 |
| MUST_PLANT      | 9           | 347    | FALSE        | year          | geno                         | 102,540.99 | NA        | 268,445.69 | 370,986.67 | 0.276 | 0.436 |
| MUST_TA         | 9           | 347    | FALSE        | year          | geno, Cross, RPV3, row       | 0.57       | 0.20      | 0.76       | 1.66       | 0.510 | 0.936 |
| MUST_TARTRIQUE  | 11          | 347    | FALSE        | year          | geno, Cross, row             | 0.12       | 1,925.34  | 1.07       | 1.55       | 0.169 | 0.245 |
| MUST_TAVP       | 9           | 347    | FALSE        |               | geno                         | 1.40       | NA        | 4.17       | 5.57       | 0.252 | 0.231 |
| NB_CLUST_PLANT  | 0           | 358    | FALSE        | year          | geno, Cross                  | 2.78       | 11.81     | 14.22      | 22.28      | 0.362 | 0.294 |
| POTASSIUM       | 11          | 347    | FALSE        | year          | geno, Cross, row, col        | 5,927.52   | 0.16      | 25,092.09  | 46,161.80  | 0.362 | 0.363 |
| SBER_W_G        | 9           | 347    | FALSE        | year          | geno, Cross, RUN_RPV         | 0.15       | 0.12      | 0.47       | 0.83       | 0.394 | 0.397 |
| SCLUST_W_G      | 9           | 347    | FALSE        | year          | geno, Cross                  | 2,741.05   | 0.05      | 4,912.42   | 9,578.82   | 0.487 | 0.463 |
| SHOOT_II_FREQ_0 | 0           | 358    | FALSE        | year          | geno                         | 0.00       | NA        | 0.80       | 0.80       | 0.001 | 0.939 |
| SHOOT_II_L      | 0           | 358    | FALSE        |               | geno                         | 2.30       | NA        | 20.52      | 22.81      | 0.101 | 0.098 |
| SHOOT_II_NB     | 0           | 358    | FALSE        | year          | geno                         | 0.64       | NA        | 3.55       | 4.19       | 0.152 | 0.157 |
| SHOOT_L         | 0           | 358    | FALSE        |               | geno, Cross, row, management | 132.72     | 0.16      | 330.83     | 634.33     | 0.317 | 0.354 |
| VER_RELATIVE    | 11          | 344    | FALSE        | year          | geno, Cross                  | 25.23      | 2.90      | 47.17      | 84.21      | 0.440 | 0.342 |
| VIGOUR_VISUAL   | 0           | 358    | TRUE         | year          | geno                         | 0.25       | NA        | 2.73       | 2.98       | 0.083 | 0.071 |
| WOODM_OIV_305   | 0           | 358    | FALSE        | year          | geno                         | 27.10      | NA        | 509.85     | 536.95     | 0.050 | 0.061 |
| YIELD_PLANT     | 9           | 347    | FALSE        | year          | geno, Cross, col             | 0.26       | 114.99    | 0.85       | 1.34       | 0.352 | 0.371 |

Table S4: Number of common SNP markers between populations

| <b>Population</b>                     | <b>EDGARR</b> | <b>Martell</b> |
|---------------------------------------|---------------|----------------|
| <b>Half-diallel</b>                   | 3,943 SNPs    | 2,804 SNPs     |
| <b>Diversity panel</b>                | 6,301 SNPs    | 4,676 SNPs     |
| <b>Half-diallel + diversity panel</b> | 3,707 SNPs    | 2,650 SNPs     |

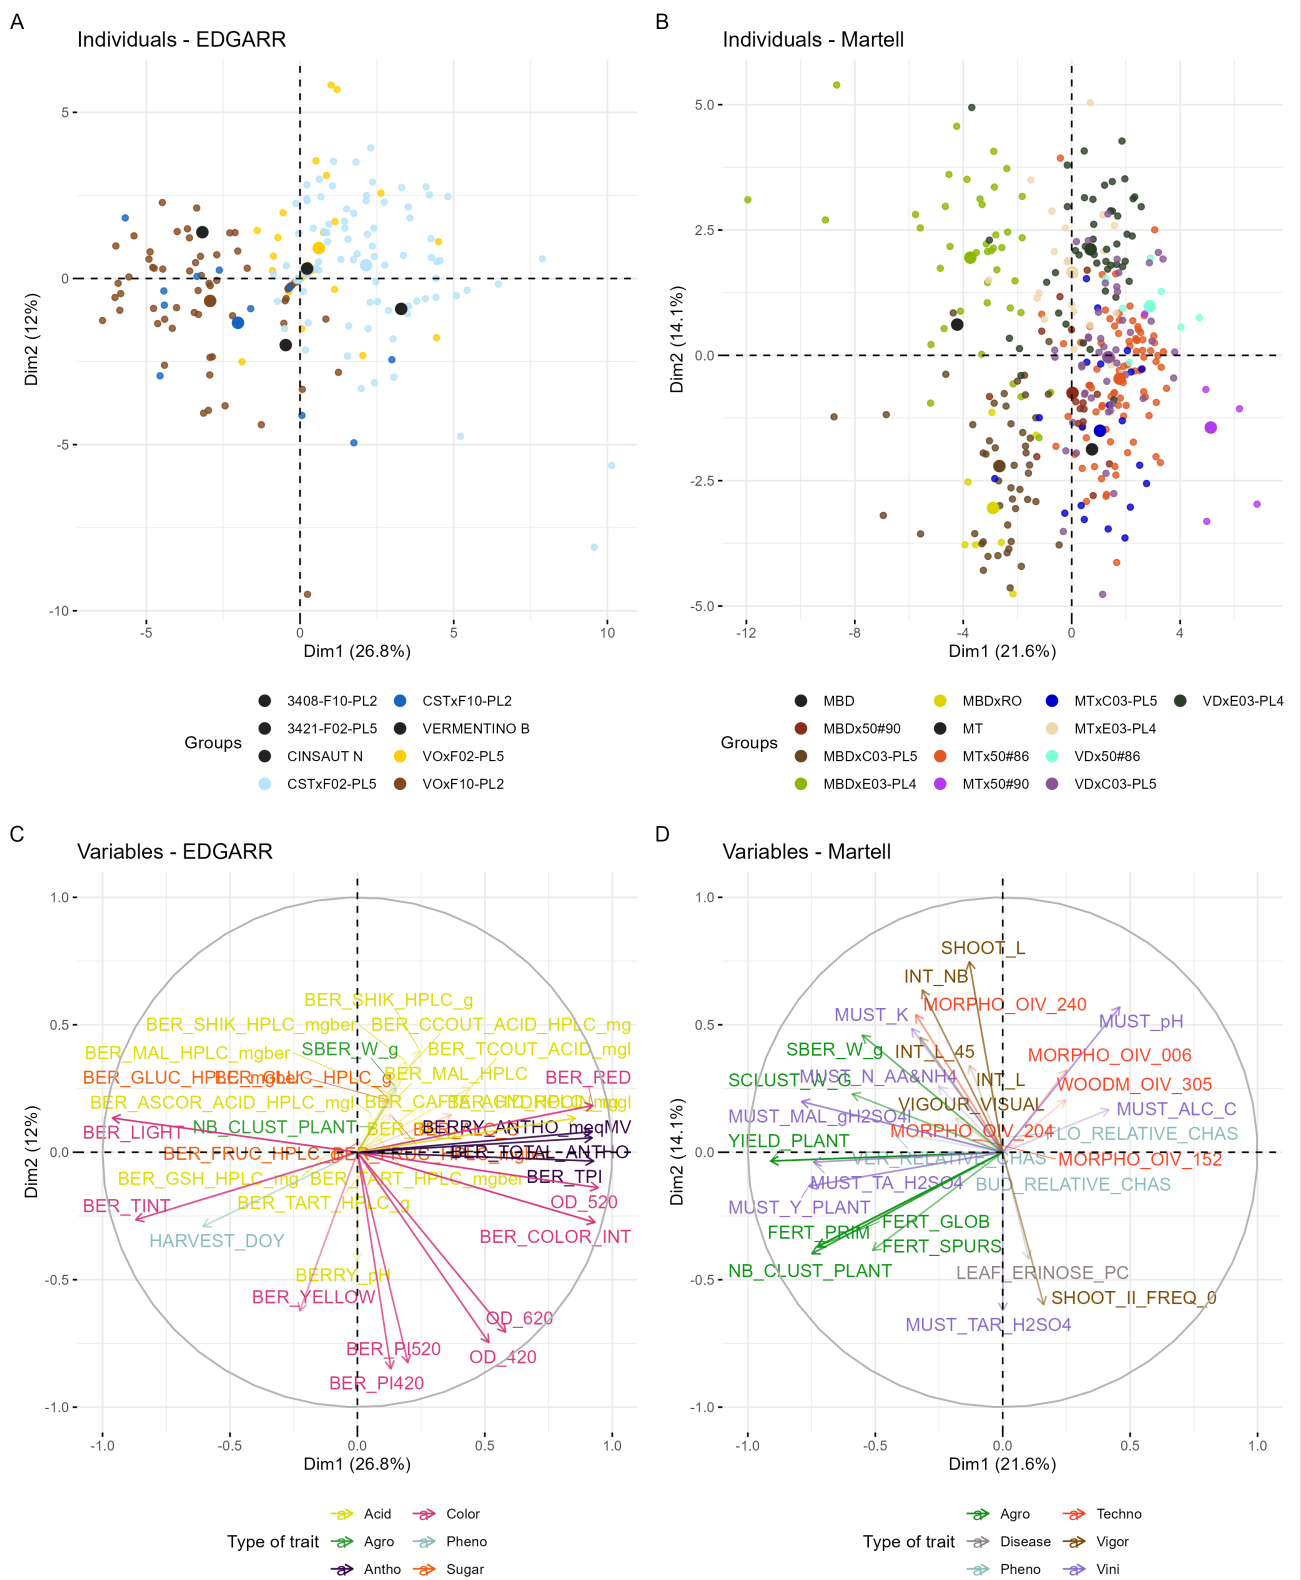

Figure S2: Phenotypic structure, results of PCA analysis. A & B: : projection of individuals for EDGARR and Martell populations, respectively. C & D: plot of variable contributions for the first two axes for EDGARR and Martell populations, respectively

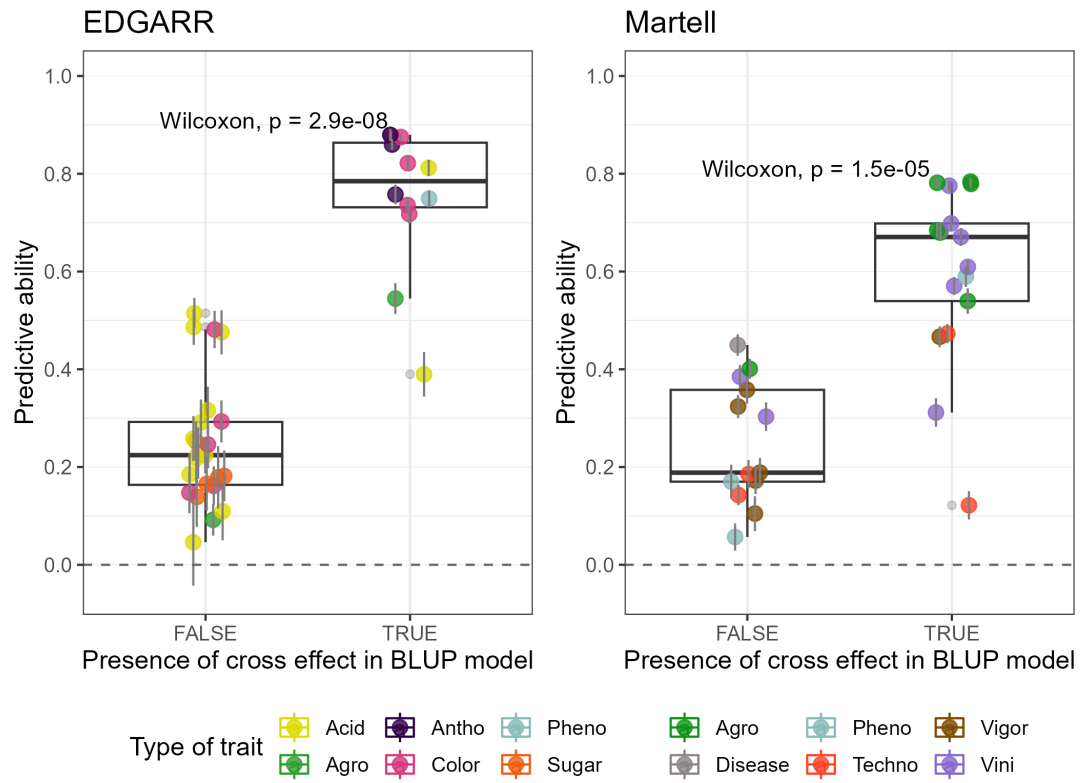

Figure S3: Effect of the presence of cross effect in the mixed model on predictive ability for both populations, for the best method between GBLUP and LASSO. Wilcoxon test was performed between the groups, and a p-value of the test is displayed in the plot.

Table S5: Ideotype definition, the direction column indicates the selection direction, if a numeric value is displayed, an optimum value is sought for this trait.

(a) EDGARR

| TRAIT           | DIRECTION | weight |
|-----------------|-----------|--------|
| BER_TART_HPLC_g | 9         | 0.49   |
| BER_LIGHT       | Max       | 0.82   |
| BER_COLOR_INT   | Min       | 0.72   |
| HARVEST_DOY     | Max       | 0.75   |
| BER_MAL_HPLC    | 13        | 0.32   |
| BER_TA_g        | 7         | 0.29   |
| BERRY_pH        | 3.5       | 0.26   |
| BER_ALC_C       | 11        | 0.25   |
| BER_TPI         | Min       | 0.76   |
| NB_CLUST_PLANT  | Max       | 0.092  |
| SBER_W_g        | Max       | 0.54   |

(b) Martell

| TRAIT          | DIRECTION | weight |
|----------------|-----------|--------|
| MORPHO_OIV_240 | 2         | 0.5    |
| FERT_GLOB      | Max       | 0.5    |
| FERT_PRIM      | Max       | 0.5    |
| YIELD_PLANT    | Max       | 1      |
| MUST_Y_PLANT   | Max       | 1      |
| MUST_MAL_H2SO4 | 3         | 0.5    |
| MUST_TAR_H2SO4 | Max       | 1      |
| MUST_K         | Min       | 0.5    |
| SCLUST_W_G     | Max       | 0.5    |
| SBER_W_G       | Max       | 0.5    |
| MUST_TA_H2SO4  | Max       | 0.5    |
| MUST_pH        | Min       | 0.5    |

Table S6: Summary of MGIDI output for EDGARR and Martell populations. Factor: closest factor where each trait belongs to, Xo and Xs: mean of the original and selected population, respectively, SD: standard deviation, SDperc: percentage of standard deviation; sense: direction of the trait for the defined ideotype, goal: 0 or 100 if the selection direction has been respected.

| EDGARR          |        |        |        |       |        |          |      |
|-----------------|--------|--------|--------|-------|--------|----------|------|
| VAR             | Factor | Xo     | Xs     | SD    | SDperc | sense    | goal |
| BER_TART_HPLC_g | FA1    | 1.78   | 2.08   | 0.30  | 16.93  | decrease | 0    |
| BER_LIGHT       | FA1    | 68.59  | 70.59  | 2.00  | 2.92   | increase | 100  |
| BER_COLOR_INT   | FA1    | 1.65   | 1.53   | -0.13 | -7.69  | decrease | 100  |
| HARVEST_DOY     | FA1    | 258.46 | 274.62 | 16.17 | 6.26   | increase | 100  |
| BER_MAL_HPLC    | FA2    | 2.19   | 3.04   | 0.85  | 38.91  | decrease | 0    |
| BER_TA_g        | FA2    | 1.73   | 2.57   | 0.84  | 48.47  | decrease | 0    |
| BERRY_pH        | FA2    | 0.17   | 0.27   | 0.10  | 60.32  | decrease | 0    |
| BER_ALC_C       | FA3    | 0.60   | 0.46   | -0.14 | -23.32 | decrease | 100  |
| BER_TPI         | FA3    | 11.75  | 8.48   | -3.27 | -27.82 | decrease | 100  |
| NB_CLUST_PLANT  | FA3    | 9.86   | 9.30   | -0.56 | -5.64  | increase | 0    |
| SBER_W_g        | FA3    | 368.31 | 379.24 | 10.93 | 2.97   | increase | 100  |

| Martell          |        |          |          |        |        |          |      |
|------------------|--------|----------|----------|--------|--------|----------|------|
| VAR              | Factor | Xo       | Xs       | SD     | SDperc | sense    | goal |
| MUST_TA_H2SO4    | FA1    | 6.92     | 7.53     | 0.60   | 8.73   | increase | 100  |
| MUST_pH          | FA1    | 3.01     | 2.94     | -0.07  | -2.29  | decrease | 100  |
| YIELD_PLANT      | FA1    | 1.38     | 1.71     | 0.34   | 24.52  | increase | 100  |
| FERT_PRIM        | FA1    | 1.09     | 1.55     | 0.46   | 41.65  | increase | 100  |
| FERT_GLOB        | FA1    | 5.37     | 7.59     | 2.22   | 41.44  | increase | 100  |
| SCLUST_W_G       | FA2    | 168.72   | 146.22   | -22.50 | -13.34 | increase | 0    |
| MUST_TAR_H2SO4   | FA2    | 7.45     | 8.36     | 0.91   | 12.24  | increase | 100  |
| SBER_W_g         | FA2    | 2.21     | 2.15     | -0.05  | -2.40  | increase | 0    |
| MUST_MAL_gH2SO4I | FA2    | 2.47     | 2.50     | 0.02   | 0.94   | decrease | 0    |
| MORPHO_OIV_240   | FA3    | 0.71     | 0.67     | -0.05  | -6.37  | decrease | 100  |
| MUST_K           | FA3    | 1,477.63 | 1,462.23 | -15.40 | -1.04  | decrease | 100  |

(a) EDGARR

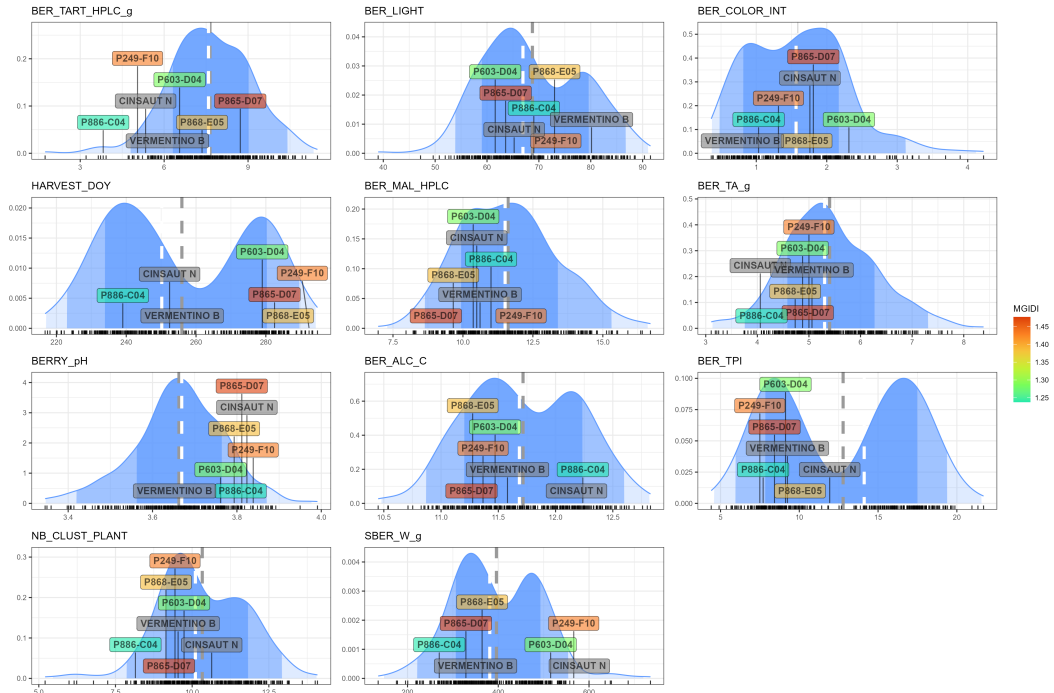

(b) Martell

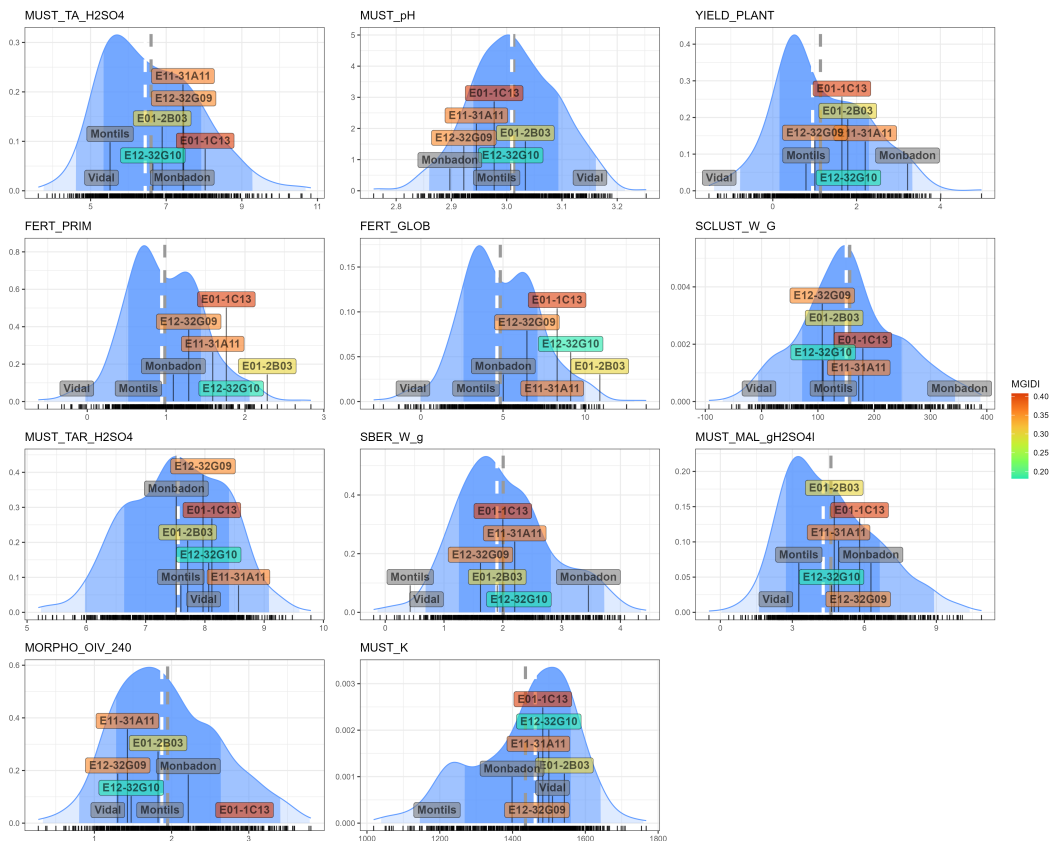

Figure S4: Distribution of genotypic values in the validation population and position of the first five individuals and the emblematic parents. A: EDGARR population, B: Martell population.

Table S7: Table of the 15 best individuals for both populations. MGIDI: multi-trait genotype-ideotype distance index. For the EDGARR population, the LASSO method predicted berry color based on genomic prediction.

| EDGARR     |                       |       |       | Martell    |                       |       |               |
|------------|-----------------------|-------|-------|------------|-----------------------|-------|---------------|
| Genotype   | Cross                 | color | MGIDI | Genotype   | Cross                 | MGIDI | recombination |
| P886-C04   | Vermentino x COL48-59 | white | 1.24  | E12-32G10  | Monbadon x C03-PL5    | 0.18  | FALSE         |
| P603-D04   | Cinsaut x F10-PL2     | red   | 1.29  | E01-2B03   | Monbadon x Rayon d'Or | 0.30  | FALSE         |
| P868-E05   | Vermentino x F10-PL2  | red   | 1.39  | E12-32G09  | Monbadon x C03-PL5    | 0.36  | FALSE         |
| P249-F10   | Cinsaut x F10-PL2     | red   | 1.43  | E11-31A11  | Monbadon x C03-PL5    | 0.37  | TRUE          |
| P865-D07   | Vermentino x F10-PL2  | red   | 1.48  | E01-1C13   | Monbadon x Rayon d'Or | 0.41  | FALSE         |
| P876-D06   | Vermentino x COL48-46 | white | 1.51  | E09-26G04  | Monbadon x C03-PL5    | 0.41  | FALSE         |
| P624-A09   | Vermentino x F10-PL2  | red   | 1.52  | E59-254B06 | C03-PL5 x Vidal       | 0.49  | FALSE         |
| P869-F04   | Vermentino x F10-PL2  | red   | 1.59  | E10-29D10  | Monbadon x C03-PL5    | 0.55  | FALSE         |
| P886-C07   | Vermentino x COL48-59 | red   | 1.65  | E20-60E04  | Montils x C03-PL5     | 0.57  | TRUE          |
| P596-A09   | Cinsaut x F10-PL2     | red   | 1.79  | E08-25A06  | Monbadon x C03-PL5    | 0.58  | FALSE         |
| P867-D05   | Vermentino x F10-PL2  | red   | 1.79  | E11-30C02  | Monbadon x C03-PL5    | 0.58  | FALSE         |
| P862-E05-D | Vermentino x F10-PL2  | red   | 1.87  | E08-25G04  | Monbadon x C03-PL5    | 0.64  | TRUE          |
| P869-B07   | Vermentino x F10-PL2  | white | 1.87  | E11-32A03  | Monbadon x C03-PL5    | 0.64  | FALSE         |
| P875-D03   | Vermentino x COL48-46 | red   | 1.89  | E11-31A10  | Monbadon x C03-PL5    | 0.67  | FALSE         |
| P865-B05   | Vermentino x F10-PL2  | white | 1.92  | E08-25A03  | Monbadon x C03-PL5    | 0.69  | FALSE         |

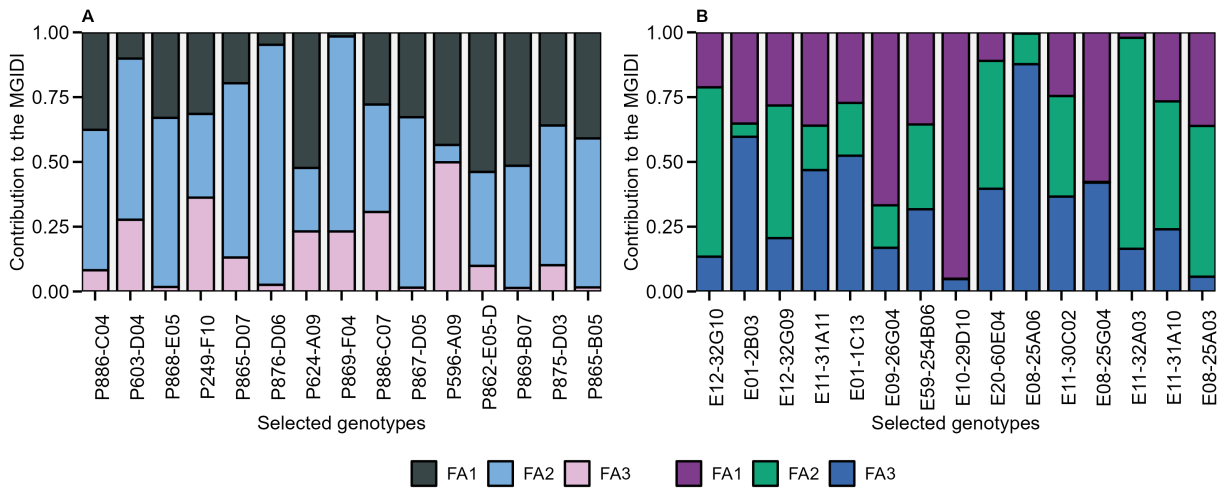

Figure S5: Strength and weakness of selected genotypes. The Y-axis represents the contribution of each factor to the distance to the ideotype. The higher the contribution, the less the genotype is close to the ideotype. Traits contributing to each factor are displayed in Table S6. A: EDGARR population, B: Martell population



(a) EDGARR

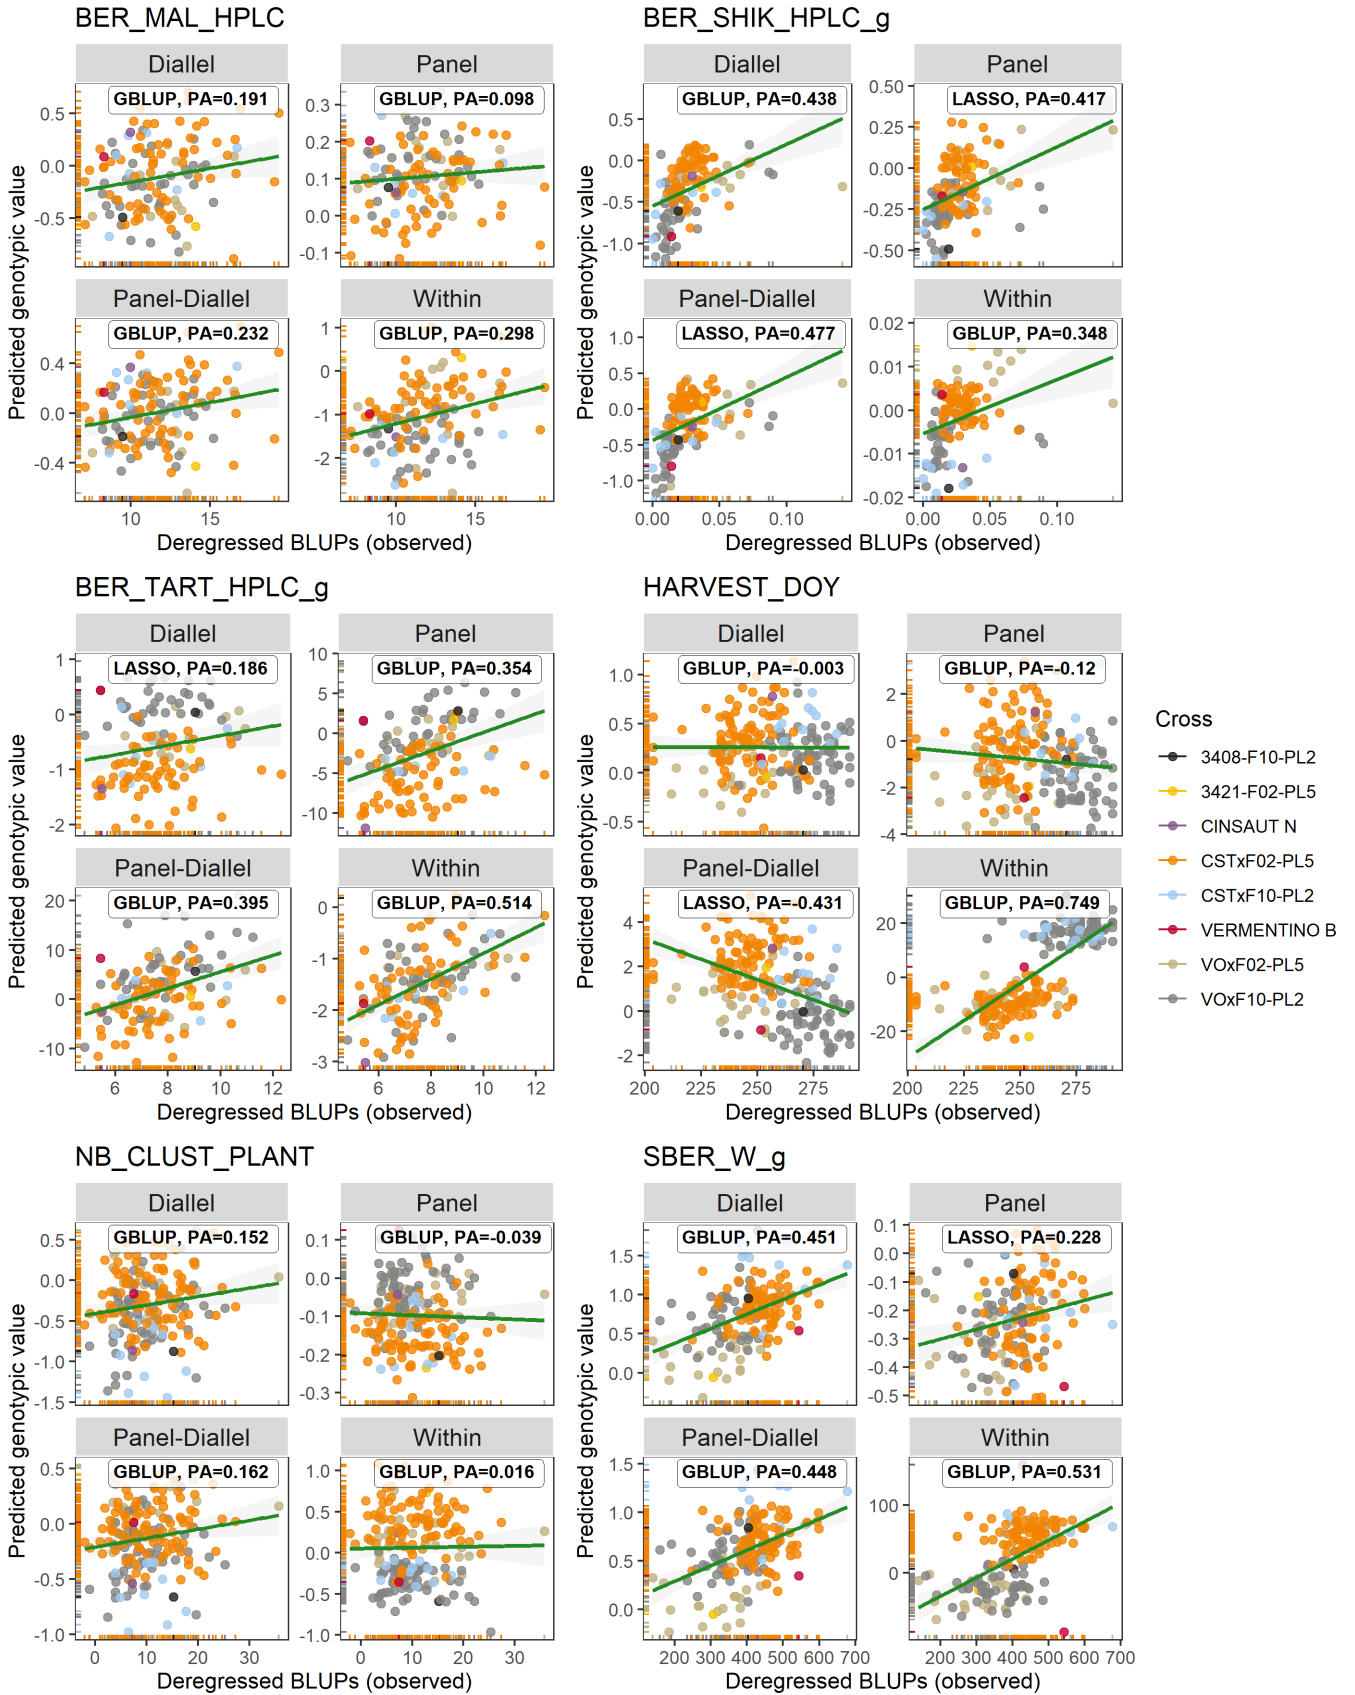

(b) Martell

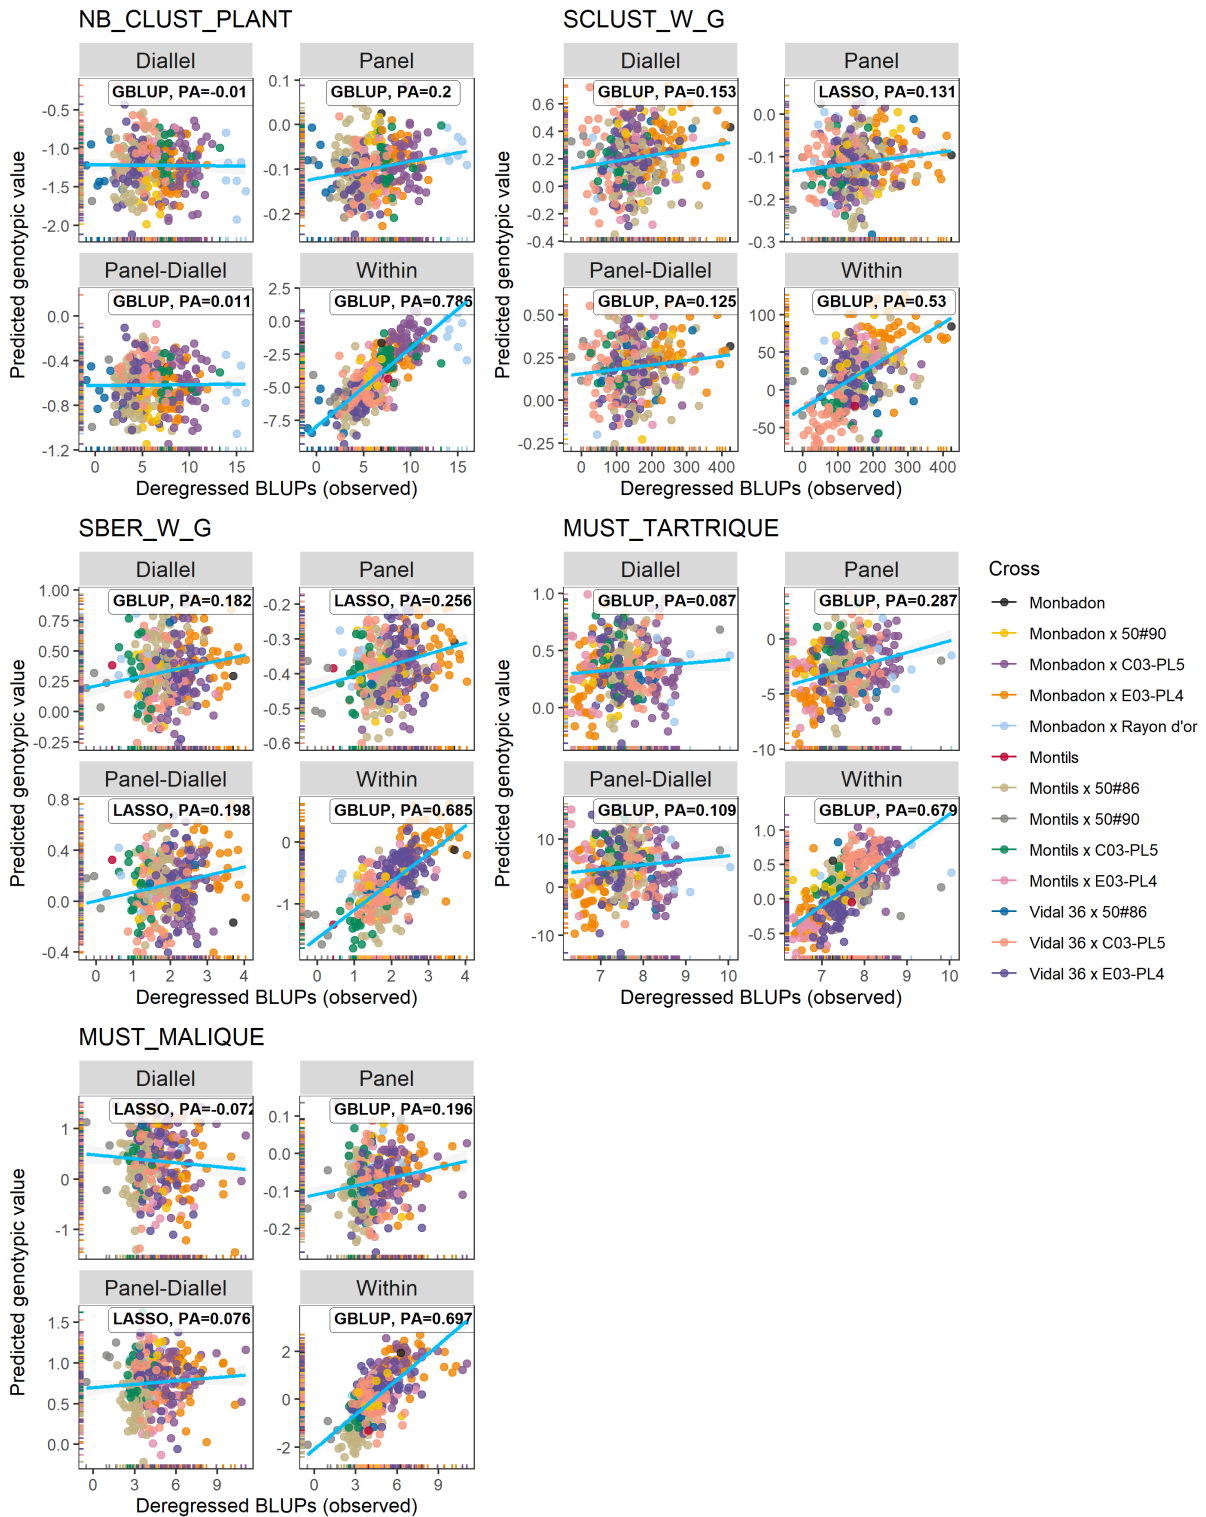

Figure S6: Scatterplot of observed genotypic values vs. predicted value using diverse training population for 6 and 5 traits for EDGARR and Martell population, respectively. The selected best method among LASSO and GBLUP is indicated in each box, as well as predictive ability. For "Within" scenario, a cross-validation within EDGARR or Martell genotypes was applied. A: EDGARR population, B: Martell population.

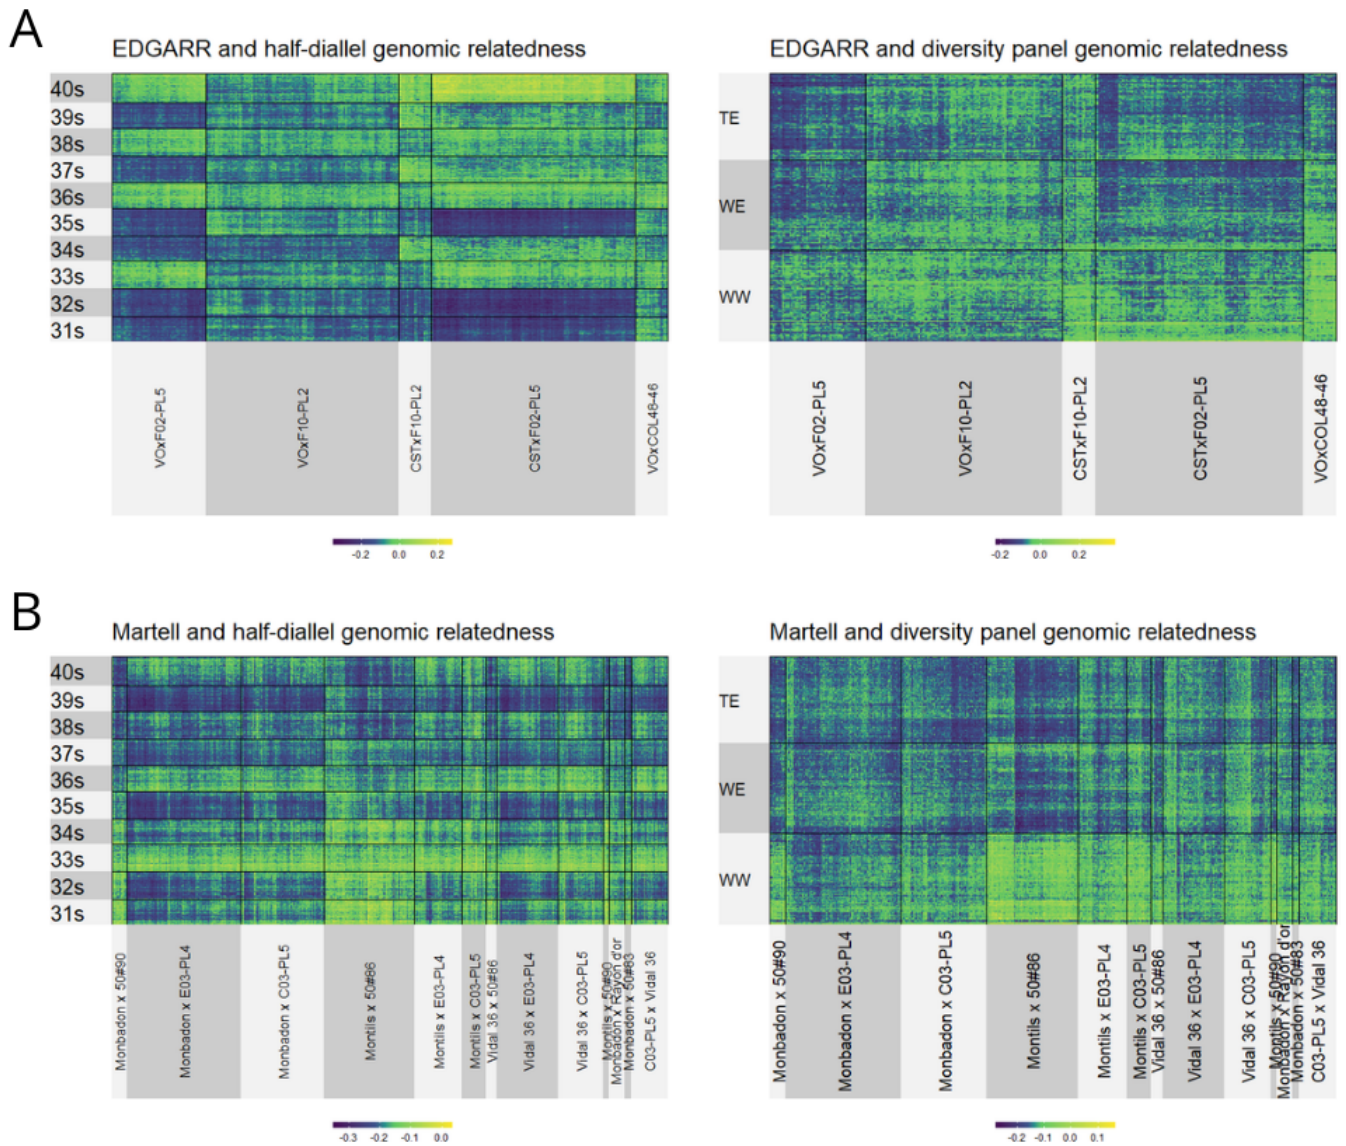

Figure S7: Pairwise additive genetic relatedness between training sets (half-diallel on the left, diversity panel on the right), and validation sets (EDGARR and Martell). Genotypes are structured by half-diallel crosses (31s to 40s), diversity panel subpopulations (WW: Wine West, WE: Wine East, TE: Table East), and EDGARR and Martell crosses. A: EDGARR population, B: Martell population
